1 **Title**

2 Metabolic analysis of a bacterial synthetic community from maize roots provides new mechanistic  
3 insights into microbiome stability

4

5 **Authors**

6 Jenna Krumbach<sup>1</sup>, Patrizia Kroll<sup>1</sup>, Vera Wewer<sup>1,2</sup>, Sabine Metzger<sup>1,2</sup>, Till Ischebeck<sup>3,4</sup> and Richard P.  
7 Jacoby<sup>1,2\*</sup>

8

9 **Affiliations**

10 1. Institute of Plant Sciences, University of Cologne, Cologne, Germany

11 2. Cluster of Excellence for Plant Science (CEPLAS), University of Cologne, Cologne, Germany

12 3. Department of Plant Biochemistry, Albrecht-von-Haller-Institute for Plant Sciences and Göttingen  
13 Center for Molecular Biosciences (GZMB), University of Göttingen, Göttingen, Germany

14 4. Institute of Plant Biology and Biotechnology (IBBP), University of Münster, Münster, Germany

15

16 **Correspondence**

17 \*Richard Jacoby

18 Current address: Structural and Computational Biology Unit, European Molecular Biology Laboratory,  
19 Heidelberg, Germany

20 Email: richard.jacoby@embl.de

21 Phone: +49 6221 387-8742

22

23 **Competing Interests**

24 The authors have no competing interests.

25 **Key words**

26 Microbial ecology; Plant-microbe interactions; Rhizosphere microbiome; Metabolism; Niche  
27 differentiation; Metabolomics; Mass spectrometry

28

29 **Day of submission**

30 28.11.2021

31

32 **Word counts**

33 Body text: 5378, Abstract: 194

34

35 **Number of body figures**

36 6

37

38 **Number of body tables**

39 0

40

41 **Number of supplementary figures**

42 4

43

44 **Number of supplementary tables**

45 4

46

47 **Abstract**

48 Stability is a desirable property for agricultural microbiomes, but there is a poor understanding of the  
49 mechanisms that mediate microbial community stability. Recently, a representative bacterial synthetic  
50 community from maize roots has been proposed as a model system to study microbiome stability (Niu  
51 2017, PNAS, 114:E2450). This SynCom assembles stably when all seven members are present, but  
52 community diversity collapses without the keystone *E. cloacae* strain. The aim of this study was to assess  
53 the role of metabolites for the stability of this SynCom, by defining the metabolic niches occupied by  
54 each strain, as well as their cross-feeding phenotypes and B-vitamin dependencies. We show that the  
55 individual member strains occupy complementary metabolic niches, measured by the depletion of  
56 distinct metabolites in exometabolomic experiments, as well as contrasting growth phenotypes on  
57 diverse carbon substrates. Minimal medium experiments show that the established seven-member  
58 community comprises a mixture of prototrophic and auxotrophic strains. Correspondingly, experimental  
59 cross-feeding phenotypes showed that spent media harvested from the prototrophic strains can sustain  
60 growth of two auxotrophs. We suggest that the metabolic mechanisms exhibited by this SynCom could  
61 serve as design principles to inform the rational assembly of stable plant-associated microbial  
62 communities.

63

64

## 65 **Introduction**

66 A deeper understanding of microbiome stability is a major research goal in the field of microbiome  
67 science and technology (1). Potentially, stability criteria could help to predict how different microbiomes  
68 respond to disruption, such as environmental change or biotic invasion (2). Furthermore, a mechanistic  
69 understanding of microbiome stability could help to rationally formulate bio-inoculants in agriculture  
70 and medicine, via combining cooperative strains into stable synthetic communities that will persist in  
71 the target environment (3).

72

73 Conceptually, metabolism is positioned as a central factor mediating microbiome stability, underpinned  
74 via two major processes: 1) Niche differentiation, and 2) Cross-feeding (4,5). The ecological principle  
75 of niche differentiation stipulates that organisms which coexist in the same habitat must avoid  
76 competition by consuming different resources (6). Although theoretical studies predict that niche  
77 differentiation plays a major role in facilitating the diversity of microbiome composition, there are still  
78 significant knowledge gaps regarding the specific metabolites consumed by individual strains (7).  
79 Meanwhile, cross-feeding is also proposed to facilitate microbial diversity, because the metabolites  
80 released by one strain could provide a set of new nutrient niches to support the coexistence of other  
81 strains, and furthermore because the release of exogenous vitamins and amino acids would also support  
82 microbial diversity by nourishing auxotrophic strains (8). However, there is a relatively poor  
83 mechanistic knowledge of which particular microbial strains engage in cross-feeding, and what specific  
84 metabolites are shared (9).

85

86 The laboratory study of metabolic interactions in microbial communities has been hampered by the lack  
87 of experimentally tractable systems (10). However, a recently characterised seven-member bacterial  
88 synthetic community from maize roots is emerging as a model system for plant microbiome research  
89 (11). Notably, this SynCom assembles stably when all seven members are present, but the removal of  
90 strain Ecl results in a collapse of microbial community diversity. This observation is reminiscent of the  
91 keystone effect in macroecology, whereby one particular species plays a disproportionately large role in  
92 facilitating ecosystem diversity (12).

93

94 The objective of this study was to describe the metabolic characteristics of this previously established  
95 seven-member bacterial SynCom, by exploring the concepts of niche differentiation and cross-feeding.  
96 We conducted experiments to: 1) Assess the metabolic niche of each strain, 2) Describe cross-feeding  
97 interactions between donor and recipient strains, and 3) Define the B-vitamin responses of SynCom  
98 members. These measurements help to interpret the data of Niu et al (11), by providing mechanistic  
99 explanations for why certain strains play a disproportionate role in structuring community assembly.

100

## 101 **Methods**

### 102 *Exometabolomics of bacterial cultivated on maize root extract*

103 Microbial exometabolomics on maize root extracts was conducted according to the method adapted  
104 from Jacoby et al (13). Maize seeds (v. Sunrise) were purchased from Agri-Saaten Ltd, and sterilised in  
105 70% ethanol for 15 min, followed by 5% NaHClO<sub>4</sub> for 15 min, rinsed five times with sterile water, then  
106 incubated in sterile water at 50° C for 10 min. Individual seeds were then placed in Petri dishes with 10  
107 mL of sterile water and incubated in the dark for 4 days at 30° C. Next, germinated seedlings were  
108 transferred into a sterile hydroponic growth system, enclosed in transparent plastic boxes with HEPA-  
109 filters for gas exchange (Sac O<sub>2</sub> Ltd), with roots supported by 3 mm glass beads, and growth medium  
110 containing 0.5× Hoagland's solution. Plants were placed in a growth chamber with 23/18° C day/night  
111 temperature, 16 h daylength, and 150 μmolm<sup>-1</sup>s<sup>-1</sup> light intensity. Plants were cultivated for seven days,  
112 with growth medium changed once. At harvest, roots were separated from shoots, washed three times  
113 in sterile 10 mM MgCl<sub>2</sub>, then root tissue was snap-frozen in liquid N<sub>2</sub>.

114

115 For metabolite extraction, frozen maize root tissue was ground to a fine powder using a mortar and  
116 pestle and liquid nitrogen. Next, 200 mg of tissue powder was placed into a 1.5 mL tube, and incubated  
117 with 1 mL of 90% MeOH at 60° C for 30 min with 1500 rpm shaking. Tubes were centrifuged at 10,000×  
118 g for 10 min, then 800 μl of supernatant was transferred to a new tube and dried down in a vacuum  
119 centrifuge overnight. Next, dried metabolites were dissolved in water and filter-sterilised (0.22 μm pore  
120 size). Total organic carbon (TOC) concentration was measured using a Dimatoc 2000 (Dimatec).

121  
122 For bacterial pre-culture, strains were streaked from glycerol stocks onto TSA plates (0.5× TSB, 1.2%  
123 agar) and incubated at 28° C for 1-2 days. Individual colonies were picked and transferred into 4 mL of  
124 0.5× TSB at 28° C with 200 rpm shaking for 1-2 days. Cells were harvested by centrifuging 900 mL of  
125 culture at 5,000× g for 5 min at RT. Cell pellets were then washed twice with 900 mL of sterile 10 mM  
126 MgCl<sub>2</sub>, and resuspended at a final OD<sub>600</sub> of 1 in sterile 10 mM MgCl<sub>2</sub>. The C7 mixture of all seven  
127 strains was prepared by equally combining washed bacterial cells at OD=1.

128  
129 Next, bacteria were cultivated on an M9 growth medium where maize root extracts were the sole carbon  
130 source. The medium contained 24 mM Na<sub>2</sub>HPO<sub>4</sub>, 20 mM NH<sub>4</sub>Cl, 11 mM KH<sub>2</sub>PO<sub>4</sub>, 4 mM NaCl, 1 mM  
131 MgSO<sub>4</sub>, 100 μM CaCl<sub>2</sub>, 50 μM Fe-EDTA, 50 μM H<sub>3</sub>BO<sub>3</sub>, 10 μM MnCl<sub>2</sub>, 1.75 μM ZnCl<sub>2</sub>, 1 uM KI, 800  
132 nM Na<sub>2</sub>MoO<sub>4</sub>, 500 nM CuCl<sub>2</sub>, and 100 nM CoCl. To this, maize root extracts were added to a final  
133 concentration of 720 μg C per mL. Growth assays were conducted in a 48-well plate, by adding 20 μL  
134 of resuspended bacterial pellet into 380 μL of medium, and incubating the plate in a plate reader (Tecan  
135 Infinite Pro 100) at 28° C for 24 h, with shaking (3 min continuous orbital shaking followed by 7 min  
136 stationary, shaking amplitude 3 mm). A negative control (no bacteria) was also prepared by adding 20  
137 uL of sterile 10 mM MgCl<sub>2</sub> to the growth medium, and was incubated side-by-side with the bacterial  
138 cultivations. Spent media were harvested by centrifuging cultures at 10,000x g for 3 min, then filter-  
139 sterilising the derived culture supernatants using 0.22 μm spin filters.

140  
141 For untargeted LC-MS analysis of culture supernatants, 5 μl of sample was loaded onto a C18 column  
142 (XSelect HSS T3, 2.5 μm particle size, 10-nm pore size, 150 mm length by 3.0 mm width; Waters),  
143 using an HPLC (Dionex Ultimate 3000, Thermo Scientific). Buffer A was 0.1% FA in water, buffer B  
144 was 0.1% FA in methanol, and flow rate was 500 μl/min. Samples were eluted using the following  
145 gradient: hold at 1% B between 0 to 1 min, linear increase to 40% B until 11 min, linear increase to 99%  
146 B until 15 min, hold at 99% B until 16 min, linear decrease to 1% B until 17 min, and finally, hold at  
147 1% B until 20 min. MS was conducted using a Q-TOF MS (maXis 4G; Bruker Daltonics), following  
148 ESI. The MS was operated in both positive and negative-ion modes, using N<sub>2</sub> as drying gas at a flow

149 rate of 8 litres/min, dry heater set to 220° C, nebulizer pressure of 1.8 bar, capillary voltage of 4,500 V,  
150 and collision radio frequency voltage of 370 V (corresponding to a mass range of 50 to 1,300 m/z). Scan  
151 rate was 1 Hz.

152

153 To process the untargeted LC-MS data, raw .D files were centroided and converted to .MZMXL using  
154 the MSConvert program (14). Files were then uploaded to XCMS online (15) and were aligned using  
155 the following parameters: m/z tolerance of 15 ppm, minimum peak width of 10 s, maximum peak width  
156 of 60 s, signal/noise threshold of 10, overlapping peaks split when m/z difference was greater than 0.01  
157 m/z, features only considered if they occurred in at least five consecutive scans with an intensity greater  
158 than 5,000. Also, features were only considered if they occurred in at least two of three replicates from  
159 any sample group. The CAMERA algorithm was implemented to detect isotopes and adducts. Following  
160 export of files from XCMS online, data from both positive and negative-ion modes were combined, and  
161 filtered to remove isotopic peaks, and also filtered to only include MS features with RT between 1 to 16  
162 min.

163

164 The statistical analysis of the LC-MS exometabolomic data had two aims: 1) To detect maize metabolite  
165 ions that were depleted from the medium following bacterial growth, and 2) To detect microbe-derived  
166 metabolite ions that were enriched in the medium following bacterial growth. Both strategies involved  
167 comparing the metabolomic profiles of the inoculated samples versus the uninoculated negative control.  
168 For a metabolite ion to be categorised as depleted, thresholds were: signal intensity < 50% versus sterile  
169 control, p-value < 0.05. For a metabolite ion to be categorised as enriched, thresholds were signal  
170 intensity > 200% versus sterile control, p-value < 0.05.

171

172 To assign candidate IDs to the metabolite ions of interest, m/z values were searched using CEU Mass  
173 Mediator (16) against the Metlin database (17) with 10 ppm tolerance, for various common adducts  
174 (positive mode: M+H, M+Na, M+K; negative mode: M-H, M+Cl, M+FA). In cases where multiple  
175 database compounds matched to the same m/z value, the compound with the lowest Metlin database

176 identifier was chosen. These candidate metabolite IDs were then grouped into chemical categories using  
177 the ClassyFire database (18).

178

179 For GC-MS quantification of bacterial primary metabolite depletion from maize root extracts, 50  $\mu$ l of  
180 spent or fresh medium was pipetted into 500  $\mu$ l of Methanol/Chloroform/Water (5:2:1 (v/v/v)), and 200  
181 of *allo*-inositol (5  $\mu$ g/ml) was introduced into each sample as an internal standard. Next, 100  $\mu$ L of the  
182 polar fraction was dried under a stream of N<sub>2</sub> gas, and derivatised with 15  $\mu$ l methoxyamine  
183 hydrochloride in pyridine (30 mg/ml) and 30  $\mu$ l N-Methyl-N-(trimethylsilyl) trifluoroacetamide  
184 (MSTFA) (19). The samples were analysed on an Agilent 5977N mass selective detector connected to  
185 an Agilent 7890B gas chromatograph, as previously described (20). Primary metabolites were quantified  
186 according to the intensity of reporter ions previously obtained for pure reference compounds, normalised  
187 to the intensity of the *allo*-inositol internal standard. Bacterial depletion of primary metabolites was  
188 measured by comparing the normalised metabolite abundance in the inoculated samples versus the  
189 sterile controls.

190

### 191 ***Phenotype microarray***

192 Phenotype microarrays were conducted using BIOLOG EcoPlate according to the manufacturer's  
193 instructions. The seven bacterial strains were pre-cultured, harvested and washed as described above,  
194 then diluted to an OD value of 0.1 in sterile 10 mM MgCl<sub>2</sub>. At this point, strains were mixed equally  
195 mixed together to compose either C7 communities or C6 drop-outs, and 150  $\mu$ L of bacterial suspension  
196 was inoculated into each well of the 96 well-plate. Plates were incubated at 28° C for two days, and  
197 A590 was measured using a Tecan M100 Infinite Pro.

198

199 For analysis of phenotype microarray data, A590 values from all substrate-containing wells were  
200 compared to a negative control (no substrate) via Student's t-test, and growth was considered positive  
201 if p-value < 0.05 and A590 > 0.1. In our hands, two substrates (2-hydroxy-benzoic acid and alpha-D-  
202 lactose) were not utilised by any bacterial inoculation and were therefore excluded from the analysis.

203



204 ***Minimal medium growth assays***

205 For assays of bacterial growth on single carbon substrates, bacteria were pre-cultured, harvested and  
206 washed as described above. Medium composition was the same as the M9 minimal medium described  
207 above, where all individual carbon sources were included at a concentration of 720  $\mu\text{g C}$  per mL. Growth  
208 assays were conducted in a 96-well plate, where each well contained 95  $\mu\text{L}$  of medium, inoculated with  
209 5  $\mu\text{L}$  of bacterial suspension, and cultivated in a plate reader (Tecan M100 Infinite Pro) using the same  
210 program as described above, except that data was collected over two days. Growth curves were  
211 quantitatively analysed using the Growthcurver R package (21).

212

213 ***Bacterial cross-feeding assays***

214 To analyse pairwise cross-feeding phenotypes across different carbon sources, the assay began by pre-  
215 culturing the three donor strains which could successfully grow on minimal medium (Ecl, Hfr and Ppu).  
216 This was conducted by picking colonies from TSA plates and transferring them into 4 mL of minimal  
217 medium, formulated as described above with either glucose, malate or alanine as sole carbon source at  
218 720  $\mu\text{g C}$  per mL, then incubating at 28° C with 200 rpm shaking for 2 days. The derived culture  
219 supernatants were harvested by centrifuging at 10,000x g for 3 min, then filter-sterilising the  
220 supernatants using 0.22  $\mu\text{m}$  filters. In parallel, all seven recipient strains were pre-cultured on 0.5 $\times$  TSB,  
221 harvested and washed as described above. In a 96-well plate, 5  $\mu\text{L}$  of bacterial suspensions (OD=1) from  
222 the recipient strains were inoculated into 95  $\mu\text{L}$  culture supernatants harvested from the donor strains,  
223 alongside a negative control of sterile 10 mM  $\text{MgCl}_2$  that was included to check for sterility of culture  
224 supernatants. Growth assays and quantitative analysis were performed as described above.

225

226 ***Vitamin response assays***

227 Several methodological strategies were used to dissect the vitamin responses of these strains. First, the  
228 responses of all seven strains to a mixture of B-vitamins was undertaken, whereby bacteria were pre-  
229 cultured, harvested and washed as described previously, and inoculated into a minimal medium  
230 containing either all eight B-vitamins or no vitamin addition. The provided vitamins were: (list). In this  
231 first experiment, the carbon sources were a mixture of 20 carbon substrates (glucose, myo-inositol,

232 sorbitol, sucrose, xylose, 2-oxoglutarate, citrate, malate, pyruvate, succinate, GABA, glutamate, glycine,  
233 L-alanine, D-alanine,  $\beta$ -alanine, L-arginine, D-arginine, putrescine and urea). Each carbon source was  
234 provided at 36 mg C per L, such that the combined carbon concentration in the medium was again 720  
235 mg C per L. These diverse carbon substrates were provided in order to maximise the probability of  
236 observing a positive growth phenotype, unobscured by substrate preference effects. Next, we  
237 investigated the specific vitamins required for the growth of strains Opi and Cpu, this time providing  
238 single carbon sources of either alanine (for Opi) or glucose (for Cpu). These substrates were chosen  
239 following preliminary experiments that identified these compounds as preferred single carbon substrates  
240 for each strain. Here, two approaches were used to pinpoint vitamin auxotrophies: either the addition of  
241 a single vitamin (V1 approach) or the removal of a single vitamin from the eight-vitamin mix (V7  
242 approach). In both approaches, vitamins were provided at the previously used concentrations.

243

244 To integrate our experimental observations of vitamin auxotrophy with computational predictions of  
245 vitamin biosynthesis capacities, we interrogated the computational genome annotations for these  
246 genetically sequenced strains using the IMG database (22). These gene annotations were cross-  
247 referenced against a list of EC numbers for all characterised enzymes of bacterial vitamin synthesis,  
248 taken from Rodionov et al (23).

249

## 250 **Results**

### 251 *Exometabolomic profiling of the SynCom on maize root extract*

252 First, we hypothesised that the stable assembly of this community could be the result of metabolic  
253 resource partitioning, whereby the strains avoid direct competition by occupying differential metabolic  
254 niches in the maize rhizosphere habitat. To investigate this, we undertook a high-throughput LC-MS  
255 exometabolomic analysis to identify which maize root metabolites the strains consume as growth  
256 substrates. Methodologically, this involved cultivating the microbes on a growth medium where maize  
257 root extracts were the sole carbon source, then analysing the derived culture supernatants using LC-MS.  
258 The derived data enabled us to profile how the strains had modulated their chemical environment,

259 providing new information about the maize root metabolites consumed by each strain, and the microbe-  
260 derived metabolites released into the growth medium.

261  
262 Our data analysis strategy initially focussed on characterising microbial substrate preferences, by  
263 identifying the metabolite peaks that were present in the sterile medium but depleted following bacterial  
264 growth. The derived data is presented as a heatmap of 425 metabolite ions depleted by at least one strain  
265 (Fig 1a). Investigating the metabolite depletion profiles, we observe clear evidence of niche  
266 differentiation, because each strain depletes a distinct set of metabolite ions. Intriguingly, the C7 seems  
267 to combine the metabolic capabilities of each individual strain, with this ‘addition effect’ meaning that  
268 the C7 occupies a much broader metabolic niche compared to any single individual.

269  
270 We sought to gain more information about the chemical identity of these depleted metabolite ions. There  
271 is considerable uncertainty in these data, because our workflow involved matching the m/z values of  
272 these high-resolution MS measurements against the Metlin database. Therefore, we name these  
273 ‘Candidate metabolite IDs’, which were then grouped into chemical category according to the Classyfire  
274 database. Our aim was not to generate a comprehensive list of all detected metabolites, but instead to  
275 narrow down which metabolites niches are occupied by the individual strains.

276  
277 To present the data, we integrate the heatmap of metabolite depletion profile with the chemical  
278 categorisations of the candidate metabolite IDs. The heatmap dominated by a large grouping of depleted  
279 metabolite ions that were only depleted by three inocula: Ecl, Cpu and C7. Chemically, many of these  
280 m/z values were categorised in the group ‘glycosylated compounds’, and closer inspection of the data  
281 indicated that this cluster includes a large number of maize secondary metabolites, including sugar  
282 conjugates of flavonoids and benzoxaolones (Table S1). The overlapping niches of these two strains is  
283 notable, because the work of Niu et al (2017) found that the absence of Ecl allows Cpu to dominate the  
284 assembled community.

285

286 The heatmap also contains a relatively small cluster of 52 metabolite ions that were universally depleted  
287 by all seven strains. Chemical categorisation showed that this cluster contained a large proportion of  
288 primary metabolites, such as amino acids and organic acids. We validated this observation using GC-  
289 MS exometabolomic profiling of the same samples, which showed that the consumption of major sugars,  
290 organic acids and amino acids was commonly exhibited by all seven strains (Fig S1). Assessing this  
291 result, we conclude that primary metabolites probably play a minor role in mediating niche  
292 differentiation, although they clearly represent important growth substrates.

293

294 Our second data analysis strategy with the untargeted LC-MS exometabolomics dataset involved  
295 determining which microbe-derived metabolites were released into the growth medium by each strain.  
296 This heatmap is dominated by a large cluster of metabolite ions predominately released by strain Cpu  
297 (Fig 1d). Chemically, many of these m/z values were categorised as ‘amino acids and derivatives’, and  
298 include several free benzoxazolones lacking the sugar group (Fig 1e-f, Table S2). Due to Cpu’s potential  
299 to dominate the other strains, we suggest that metabolite ions could represent antimicrobial compounds  
300 or other chemical antagonists.

301

### 302 *Substrate utilisation profiles of the SynCom and C6 drop-outs*

303 Although our exometabolomics workflow provided a high-throughput method to measure the metabolic  
304 footprints of the SynCom strains, the major disadvantage of this approach is that there is considerable  
305 uncertainty regarding the chemical identity of the detected metabolite ions. Therefore, we undertook an  
306 orthogonal methodology to assess metabolic niche occupancy of the SynCom strains, by measuring their  
307 substrate utilisation profiles using via BIOLOG EcoPlate. This well-established method measures the  
308 metabolic activity of microbes cultivated in a 96-well plate, wherein each well is pre-loaded with a  
309 single chemical substrate as the sole carbon source.

310

311 Our first experiment involved measuring the substrate utilisation profiles of all seven individual strains  
312 and the C7. The derived heatmap clearly discriminates the strains according to distinct metabolic niches,  
313 such as Ecl (carbohydrates), Cin (polymers) and Ppu (amines and amides) (Fig 2). This reaffirms our

314 previous observation that the C7 combined the substrate utilisation capacities of all constituent strain,  
315 which again illustrates the ‘addition effect’ that was consistently observed in all three metabolic profiling  
316 methodologies used in this study (Fig S2).

317

318 We undertook a second experiment, which assessed how much influence each strain exerts over the  
319 metabolic activity of the C7. Here, we undertook C6 drop-out experiments analogous to the approach  
320 of Niu et al (11), by removing individual strains from the community. Results showed that removal of  
321 strains Ecl and Ppu made the biggest impact on substrate utilisation. Specifically, removal of Ecl  
322 manifested in lower utilisation of carbohydrates, whereas Ppu removal resulted in lower utilisation of  
323 amino acids and nitrogenous compounds (Fig 3a). We plotted these data using PCA (Fig 3b), and then  
324 integrated our results with the study of Niu et al (11) by comparing their community assembly data  
325 versus our metabolic activity profiles (Fig 3c). There is clear concordance between the two datasets,  
326 with both studies showing that C6 communities lacking Ecl and Ppu were the two groups exhibiting the  
327 largest differences to C7, in terms of both community assembly and metabolic function. This correlative  
328 link provides evidence that metabolic properties can help to explain why certain strains exert a  
329 disproportionate influence on community assembly.

330

### 331 *Cross-feeding phenotypes of the SynComs strains*

332 We then explored pairwise cross-feeding interactions amongst SynCom strains. This initially involved  
333 determining which of the seven strains could grow on a minimal medium without any additional  
334 vitamins (Fig 4a). Across nine carbon substrates, only Ecl, Hfr and Ppu exhibited positive growth  
335 phenotypes, with Ecl generally growing fastest (Fig 4b).

336

337 Once we had defined these three strains as prototrophic, our next step was to conduct cross-feeding  
338 assays, by harvesting filter-sterilised culture supernatants from the three prototrophic strains to provision  
339 as growth media for all seven strains (Fig 4c). This dataset revealed that the effectiveness of cross-  
340 feeding involves a complex interplay of effects relating to donor strain, recipient strain and carbon  
341 source. For instance, the organic acid malate did not support cross-feeding in any of the studied strains,

342 whereas the amino acid alanine is relatively effective at supporting cross-feeding for five recipient  
343 strains. There is little evidence of ‘donor effect’, because spent media harvested from all three  
344 prototrophic strains (Ecl, Hfr and Ppu) have generally similar potential for nourishing the recipients.  
345 Analysing ‘recipient effects’ one observation of particular interest is the ‘growth boost’ received by Opi,  
346 which cannot grow on fresh alanine medium, but grows effectively on culture supernatant harvested  
347 from three other SynCom members (Fig 4d). Taken together, these data provide experimental evidence  
348 that cross-feeding can occur in this SynCom, and categorises the strains into three potential donors (Ecl,  
349 Hfr and Ppu) and two key recipients (Opi and Cpu).

350

### 351 **B-vitamin dependencies of the SynCom strains**

352 Literature evidence shows that B-vitamin auxotrophy is widespread amongst bacteria, with the exchange  
353 of B-vitamins positioned as a key mechanism for maintaining the diversity of microbial communities  
354 (9). Here we investigated the B-vitamin responses of all seven SynCom strains, by studying their growth  
355 curves either with or without the addition of an eight-vitamin mixture containing all B-vitamins, in  
356 media containing a diversity of simple carbon substrates (Fig 5a). Data indicate that the strains can be  
357 grouped into three general categories: 1) High-responders (Opi and Cpu) that receive a growth boost  
358 from B-vitamins; 2) Non-responders (Ecl, Hfr and Ppu) that exhibit strong growth regardless of vitamin  
359 addition, and 3) Unknown (Sma and Cin) that did not grow in either condition. To demonstrate the  
360 magnitude of this differential vitamin responses, we show raw growth curves for two exemplary strains  
361 (Opi and Ecl) (Fig 5b). This showed that Ecl grows almost identically under the two conditions, whereas  
362 Opi receives a dramatic growth benefit from exogenous vitamins.

363

364 Overall, this profile of vitamin dependency is largely consistent with the results of cross feeding assays  
365 (Fig 4c). Across the two datasets, the same strains which were grouped as ‘cross-feeding donors’ (Ecl,  
366 Hfr and Ppu) show no requirement for exogenous vitamins, whereas the strains that were grouped as  
367 ‘key recipients’ (Opi and Cpu) receive a growth benefit from the addition of a vitamin mixture. This  
368 provides indirect evidence that vitamin exchange between prototrophs and auxotrophs could play a role  
369 in mediating stability of this SynCom.

370

371 Our next step was to undertake reductionist experiments to pinpoint which particular vitamins were  
372 required by the auxotrophic strain Opi. We first hypothesised that Opi was auxotrophic for one specific  
373 B-vitamin, but this was proven false, because the provision of any single vitamin failed to rescue Opi's  
374 growth phenotype (Fig 6a). Our next step was to undertake V7 'drop-out' experiments, by removing  
375 one single vitamin from the 8-vitamin mixture. Results of this experiment revealed that a significant  
376 drop in Opi's growth performance was elicited by two of the V7 mixes (V7 -Thiamine and V7 -Biotin)  
377 (Fig 6b). This provided negative evidence that Opi is a double-auxotroph for thiamine and biotin, and  
378 we next corroborated this finding with positive evidence, showing the addition of these two vitamins  
379 rescues Opi's growth phenotype in a manner similar to the V8 (Fig 6c). Taken together, we conclude  
380 that Opi is auxotrophic for both thiamine and biotin, which therefore positions the exchange of these  
381 metabolites as one candidate mechanism mediating the stability of this SynCom.

382

383 We also investigated the specific vitamins required for the growth of strain Cpu. This revealed that Cpu  
384 is auxotrophic for seven out of eight B-vitamins (all except for B12, cobalamine) (Fig S3). This suggests  
385 that Cpu has a vitamin-scavenging lifestyle, which is intriguing considering that this strain has the  
386 potential to dominate the community assembly in the absence of Ecl (11), and also that it releases a  
387 much larger set of metabolites compared to any of the other strains (Fig 1d).

388

389 Our next step was to assess how accurately vitamin auxotrophies can be predicted by genome annotation.  
390 All of these strains were previously genetically sequenced (24), and we used IMG's computational gene  
391 annotations of these sequence data to predict the vitamin biosynthesis capacity of these strains, and then  
392 compared these predictions to our experimental measurements. Results show that vitamin auxotrophy  
393 is correctly predicted in 77% of cases (27/35) (Fig S4). This suggests that computational approaches  
394 might play a useful role in preliminary screening of auxotrophic strains, but that genetic data in isolation  
395 does not yet have the capacity to fully predict vitamin auxotrophies, with laboratory experiments being  
396 necessary to provide a full characterisation of bacterial vitamin requirements.

397

398 **Discussion**

399 The motivation of this study was to define specific metabolic mechanisms that mediate strain  
400 coexistence in an established bacterial SynCom, by exploring the processes of niche differentiation and  
401 cross-feeding. Using multiple methods, we comprehensively documented the metabolic niches occupied  
402 by each strain, which demonstrated that the SynCom members exhibit metabolic complementarity.  
403 Furthermore, we described which specific strains are the donors and recipients of cross-feeding  
404 interactions, and showed that some strains were auxotrophic whereas others are prototrophic. Results of  
405 vitamin dependency experiments implicated certain B-vitamins as candidate molecules exchanged  
406 between strains. Interpreting our results, we are particularly interested in defining metabolic traits which  
407 could serve as ‘design principles’ for rationally assembling stable SynComs.

408

409 ***Metabolic complementarity as a mechanism underpinning SynCom stability***

410 The ecological principle of niche differentiation states that species which coexist in the same habitat  
411 must consume different resources in order to avoid competition (25). This principle could guide efforts  
412 to compose stable microbial communities for applications in agriculture and medicine, by matching  
413 compatible strains according to their non-overlapping substrate preferences (1). The SynCom  
414 investigated in this study was previously shown to assemble stably on maize roots (11), and therefore,  
415 we postulated that the constituent strains would occupy complementary metabolic niches.

416

417 Using multiple experimental approaches, we conclusively demonstrate that the strains in this SynCom  
418 exhibit metabolic niche complementarity, This is shown by three orthogonal lines of evidence: 1)  
419 Metabolomic footprinting on maize root extracts, which pinpoint hundreds of metabolites only  
420 consumed by individual strains, tentatively matched to maize secondary metabolites; 2) Phenotype  
421 microarray results that the strains utilise different classes of metabolic substrates (ie: polymers,  
422 carbohydrates, amides); and 3) Vitamin auxotrophy profiling, which clearly distinguished between a set  
423 of three prototrophic strains versus two auxotrophs. Interpreting these findings, we postulate that  
424 metabolic complementarity could be a causative mechanism mediating stability in this SynCom.  
425 Potentially, future experiments could test this principle across a larger number of differentially



426 formulated SynComs. For example, would SynComs composed from strains with overlapping substrate  
427 preferences exhibit a collapse in diversity due to competitive exclusion effects? In turn, can SynCom  
428 stability be promoted by combining strains that occupy non-overlapping metabolic niches? And would  
429 it be possible to engineer interdependence between strains, by combining vitamin exporters with  
430 reciprocal auxotrophs?

431  
432 In the literature, the primary rationale guiding SynCom assembly has been taxonomic  
433 representativeness, whereby individual SynCom strains are selected as representative members  
434 corresponding to the major phylogenetic groupings which occur in naturally assembled microbiomes  
435 (26). It is often presumed that taxonomically diverse communities will inevitably exhibit functional  
436 diversity, because the different microbial phyla have committed to diverging ecological strategies early  
437 in their evolutionary history (27,28). However, there is increasing evidence that bacterial metabolic traits  
438 are poorly predicted by taxonomy, with closely related strains often showing widely diverging substrate  
439 preferences, potentially mediated the horizontal transfer of metabolic genes (29). In our opinion, the  
440 concept of metabolic complementarity could be a useful tool for designing stable SynComs, because it  
441 has a stronger mechanistic basis for promoting stability compared to the standard approach of combining  
442 diverse taxa.

443

#### 444 *New insights into the metabolic properties of a keystone strain*

445 Keystone strains are of major interest in the field of microbiome engineering, because the presence of  
446 these strains promotes the diversity of the surrounding community. Therefore, keystone strains could  
447 potentially be administered in cases of microbiome dysbiosis to restore community diversity, or  
448 alternatively included into SynComs to promote the coexistence of accompanying strains (30). There is  
449 significant interest in defining which members of the plant microbiota are keystones (31), and the work  
450 of Niu et al (11) provided a useful resource to the field, because it empirically defined Ecl as a keystone  
451 strain stabilising SynCom assembly on maize roots. Here, our results build upon this previous work, by  
452 providing new mechanistic information about the metabolic properties of Ecl in relation to the other  
453 SynCom strains and also the C7.

454

455 In this study we show that Ecl is a fast-growing strain with a broad metabolic niche and a large metabolic  
456 influence on the C7. It can rapidly utilise a diverse range of carbon substrates without the need for  
457 exogenous vitamins, and its culture supernatants can sustain other strains in cross-feeding assays. We  
458 postulate that these results provide a mechanistic explanation for the keystone behaviour of Ecl  
459 demonstrated in Niu et al (11). Specifically, one element of Ecl's keystone behaviour could be its  
460 overlapping metabolic niche with the disruptive Cpu (Fig 1). Potentially, the faster-growing Ecl could  
461 outcompete Cpu for the primary usage of these maize secondary metabolites, which could prevent Cpu  
462 from dominating the community because these plant-substrates could serve as building blocks for  
463 antimicrobial compounds synthesised by Cpu. A further element could be Ecl's cross-feeding ability,  
464 whereby this prototrophic strain synthesises vitamins that are subsequently released into the  
465 environment to promote the coexistence of auxotrophic strains. Future experiments could test whether  
466 the metabolic properties exhibited by Ecl are general characteristics shared by all keystone strains, or  
467 whether they are only relevant in the context of this simplified SynCom. If these metabolic  
468 characteristics are indeed common amongst keystones, then potentially they could be used as criteria  
469 for identifying candidate keystone strains from large panels of microbial isolates.

470

#### 471 *Tailoring stable SynComs for specific plant genotypes*

472 Plant species differ in their root chemistry (32), and there is growing evidence that species-specific  
473 secondary metabolites act as a selection pressure shaping the composition of the rhizosphere microbial  
474 community (33). This has an impact on the design of plant-associated SynComs, because microbial  
475 strains need to be equipped to colonise the chemical environment unique to the target host plant. The  
476 Niu et al (11) SynCom was assembled via host-mediated selection on maize roots, which automatically  
477 means that these strains are competent in the maize root environment. In this study, we provide new  
478 information about the metabolic niches occupied by each strain, using LC-MS exometabolomics to infer  
479 that maize secondary metabolites represent a major source of differential metabolic niches, particularly  
480 for the strains Ecl and Cpu. However, we have not authenticated the identity of these maize root  
481 metabolites using reference standards, so further investigations are necessary before we can

482 unequivocally identify the specific metabolites that nourish each strain. But nevertheless, we feel that  
483 the exometabolomic approach utilised in this study could be a useful tool in tailoring SynCom design  
484 for distinct plant species, because it could facilitate the optimal matching between host root chemistry  
485 versus microbial substrate utilisation.

486

### 487 ***Conclusion***

488 This study builds upon the work of Niu et al (11), by characterising the metabolic phenotypes exhibited  
489 by each member of their previously developed seven-strain bacterial SynCom which assembles stably  
490 on maize roots. We define the metabolic interplay between the strains, by documenting their differential  
491 metabolic niche occupancies and exploring donor-recipient cross-feeding interactions. We postulate that  
492 these metabolic mechanisms could be illustrative of general principles underpinning the stability of  
493 microbial communities, which could be used to guide the rational assembly of stable SynComs.

494

### 495 **Acknowledgements**

496 We thank Ben Niu (Northeast Forestry University, China) for providing bacterial strains, Nicole Mantke  
497 (Institute of Geology and Mineralogy, University of Cologne) for performing TOC measurements, and  
498 the Service Unit for Metabolomics and Lipidomics at the University of Göttingen for GC-MS access.  
499 Research at CEPLAS is funded by the Deutsche Forschungsgemeinschaft (DFG) under Germany's  
500 Excellence Strategy – EXC 2048/1 – project 390686111. TI is funded by a Heisenberg Grant from the  
501 DFG (IS 273/10). RPJ was supported by a Humboldt Research Fellowship.

502

### 503 **Competing Interests**

504 The authors have no competing interests.

505

506 **References**

- 507 1. Lawson CE, Harcombe WR, Hatzenpichler R, Lindemann SR, Löffler FE, O'Malley MA, et al.  
508 Common principles and best practices for engineering microbiomes. *Nature Reviews*  
509 *Microbiology*. 2019 Dec;17(12):725–41.
- 510 2. Shade A, Peter H, Allison SD, Baho DL, Berga M, Buergermann H, et al. Fundamentals of  
511 microbial community resistance and resilience. *Frontiers in Microbiology*. 2012;3.
- 512 3. Konopka A, Lindemann S, Fredrickson J. Dynamics in microbial communities: unraveling  
513 mechanisms to identify principles. *ISME Journal*. 2015 Jul;9(7):1488–95.
- 514 4. Louca S, Polz MF, Mazel F, Albright MBN, Huber JA, O'Connor MI, et al. Function and  
515 functional redundancy in microbial systems. *Nature Ecology & Evolution*. 2018 Jun;2(6):936–  
516 43.
- 517 5. Goldford JE, Lu N, Bajic D, Estrela S, Tikhonov M, Sanchez-Gorostiaga A, et al. Emergent  
518 simplicity in microbial community assembly. *Science*. 2018 Aug;361(6401):469–74.
- 519 6. Nuccio EE, Starr E, Karaoz U, Brodie EL, Zhou J, Tringe SG, et al. Niche differentiation is  
520 spatially and temporally regulated in the rhizosphere. *ISME Journal*. 2020 Apr;14(4):999–  
521 1014.
- 522 7. Jacoby RP, Kopriva S. Metabolic niches in the rhizosphere microbiome: new tools and  
523 approaches to analyse metabolic mechanisms of plant-microbe nutrient exchange. *Journal of*  
524 *Experimental Botany*. 2019 Feb;70(4):1087–94.
- 525 8. Douglas AE. The microbial exometabolome: ecological resource and architect of microbial  
526 communities. *Philosophical Transactions of The Royal Society B-Biological Sciences*. 2020  
527 May;375(1798, SI).
- 528 9. Zengler K, Zaramela LS. The social network of microorganisms - how auxotrophies shape  
529 complex communities. *Nature Reviews Microbiology*. 2018 Jun;16(6):383–90.
- 530 10. Widder S, Allen RJ, Pfeiffer T, Curtis TP, Wiuf C, Sloan WT, et al. Challenges in microbial  
531 ecology: building predictive understanding of community function and dynamics. *ISME*  
532 *Journal*. 2016 Nov;10(11):2557–68.
- 533 11. Niu B, Paulson JN, Zheng X, Kolter R. Simplified and representative bacterial community of

- 534 maize roots. *Proceedings of The National Academy of Sciences of The United States of*  
535 *America*. 2017 Mar;114(12):E2450–9.
- 536 12. Mills LS, Soule ME, Doak DF. The Keystone-Species Concept in Ecology and Conservation.  
537 *Bioscience*. 1993 Apr;43(4):219–24.
- 538 13. Jacoby RP, Martyn A, Kopriva S. Exometabolomic Profiling of Bacterial Strains as Cultivated  
539 Using *Arabidopsis* Root Extract as the Sole Carbon Source. *Molecular Plant-Microbe*  
540 *Interactions*. 2018 Aug;31(8):803–13.
- 541 14. Chambers MC, Maclean B, Burke R, Amodei D, Ruderman DL, Neumann S, et al. A cross-  
542 platform toolkit for mass spectrometry and proteomics. *Nature Biotechnology*. 2012  
543 Oct;30(10):918–20.
- 544 15. Tautenhahn R, Patti GJ, Rinehart D, Siuzdak G. XCMS Online: A Web-Based Platform to  
545 Process Untargeted Metabolomic Data. *Analytical Chemistry*. 2012 Jun;84(11):5035–9.
- 546 16. Gil-de-la-Fuente A, Godzien J, Saugar S, Garcia-Carmona R, Badran H, Wishart DS, et al.  
547 CEU Mass Mediator 3.0: A Metabolite Annotation Tool. *Journal of Proteome Research*. 2019  
548 Feb;18(2, SI):797–802.
- 549 17. Smith CA, O’Maille G, Want EJ, Qin C, Trauger SA, Brandon TR, et al. METLIN - A  
550 metabolite mass spectral database. *Therapeutic Drug Monitoring*. 2005 Dec;27(6):747–51.
- 551 18. Feunang YD, Eisner R, Knox C, Chepelev L, Hastings J, Owen G, et al. ClassyFire: automated  
552 chemical classification with a comprehensive, computable taxonomy. *Journal of*  
553 *Cheminformatics*. 2016 Nov;8.
- 554 19. Bellaire A, Ischebeck T, Staedler Y, Weinhaeuser I, Mair A, Parameswaran S, et al.  
555 Metabolism and development - integration of micro computed tomography data and metabolite  
556 profiling reveals metabolic reprogramming from floral initiation to silique development. *The*  
557 *New Phytologist* [Internet]. 2014 Sep 7;202(1):322–35. Available from:  
558 <http://www.jstor.org/stable/newphytologist.202.1.322>
- 559 20. Touraine B, Vignols F, Przybyla-Toscano J, Ischebeck T, Dhalleine T, Wu H-C, et al. Iron–  
560 sulfur protein NFU2 is required for branched-chain amino acid synthesis in *Arabidopsis* roots.  
561 *Journal of Experimental Botany* [Internet]. 2019;70(6):1875–89. Available from:

- 562 <https://doi.org/10.1093/jxb/erz050>
- 563 21. Sprouffske K, Wagner A. Growthcurver: an R package for obtaining interpretable metrics from  
564 microbial growth curves. *BMC Bioinformatics*. 2016 Apr;17.
- 565 22. Chen I-MA, Chu K, Palaniappan K, Pillay M, Ratner A, Huang J, et al. IMG/M v.5.0: an  
566 integrated data management and comparative analysis system for microbial genomes and  
567 microbiomes. *Nucleic Acids Research*. 2019 Jan;47(D1):D666–77.
- 568 23. Rodionov DA, Arzamasov AA, Khoroshkin MS, Iablokov SN, Leyn SA, Peterson SN, et al.  
569 Micronutrient Requirements and Sharing Capabilities of the Human Gut Microbiome. *Frontiers*  
570 *in Microbiology*. 2019 Jun;10.
- 571 24. Niu B, Kolter R. Complete Genome Sequences of Seven Strains Composing a Model Bacterial  
572 Community of Maize Roots. *Microbiology Resource Announcements*. 2017 Sep;5(36).
- 573 25. DeBach P. The Competitive Displacement and Coexistence Principles. *Annual Review of*  
574 *Entomology* [Internet]. 1966;11(1):183–212. Available from:  
575 <https://doi.org/10.1146/annurev.en.11.010166.001151>
- 576 26. Vorholt JA, Vogel C, Carlstrom CI, Mueller DB. Establishing Causality: Opportunities of  
577 Synthetic Communities for Plant Microbiome Research. *Cell Host & Microbe*. 2017  
578 Aug;22(2):142–55.
- 579 27. Langille MGI, Zaneveld J, Caporaso JG, McDonald D, Knights D, Reyes JA, et al. Predictive  
580 functional profiling of microbial communities using 16S rRNA marker gene sequences. *Nature*  
581 *Biotechnology*. 2013 Sep;31(9):814+.
- 582 28. Asshauer KP, Wemheuer B, Daniel R, Meinicke P. Tax4Fun: predicting functional profiles  
583 from metagenomic 16S rRNA data. *BIOINFORMATICS*. 2015 Sep;31(17):2882–4.
- 584 29. Kumar N, Lad G, Giuntini E, Kaye ME, Udomwong P, Shamsani NJ, et al. Bacterial  
585 genospecies that are not ecologically coherent: population genomics of *Rhizobium*  
586 *leguminosarum*. *Open Biology* [Internet]. 2015;5(1):140133. Available from:  
587 <https://royalsocietypublishing.org/doi/abs/10.1098/rsob.140133>
- 588 30. Mueller UG, Sachs JL. Engineering Microbiomes to Improve Plant and Animal Health. *Trends*  
589 *in Microbiology*. 2015 Oct;23(10):606–17.

- 590 31. Carlstroem I C, Field CM, Bortfeld-Miller M, Mueller B, Sunagawa S, Vorholt JA. Synthetic  
591 microbiota reveal priority effects and keystone strains in the Arabidopsis phyllosphere. *Nature*  
592 *Ecology & Evolution*. 2019 Oct;3(10):1445–54.
- 593 32. Wippel K, Tao K, Niu Y, Zgadzaj R, Kiel N, Guan R, et al. Host preference and invasiveness  
594 of commensal bacteria in the Lotus and Arabidopsis root microbiota. *Nature Microbiology*  
595 [Internet]. 2021; Available from: <https://doi.org/10.1038/s41564-021-00941-9>
- 596 33. Jacoby RP, Koprivova A, Kopriva S. Pinpointing secondary metabolites that shape the  
597 composition and function of the plant microbiome. *Journal of Experimental Botany*. 2021  
598 Jan;72(1, SI):57–69.
- 599

600 **Figure Legends**

601 ***Figure 1: Metabolic footprints of the SynCom and constituent strains on maize root extract.***

602 (A) Heat map showing metabolite depletion profiles for 425 metabolite ions present in maize root  
603 extract, measured by LC-MS exometabolomics. Metabolite ions were included if they were depleted by  
604 at least one inoculum (LC-MS abundance<50% compared to sterile control,  $p<0.05$ ), cell colour  
605 represents the mean depletion value from three independent replicates. Rows were clustered via Pearson  
606 correlation. The numbered panel to the right of the heatmap shows 11 clusters of metabolite ions, the  
607 grey triangle indicates where the dendrogram was cut to split these clusters. (B) Box plots of metabolite  
608 ion depletion for two metabolite ion clusters in panel A. Cluster 1 contains metabolite ions generally  
609 depleted by all seven strains and the C7, whereas cluster 8 contains metabolite ions that were primarily  
610 depleted only by strains Cpu, Ecl and the C7. (C) Pie charts showing the chemical category of the  
611 candidate metabolite IDs for these two clusters. Candidate IDs were generated by searching the m/z  
612 value of the depleted metabolite ion against the Metlin database, and then the Classyfire database was  
613 used to categorise the chemical class of the top hit. (D) Heat map of metabolite enrichment profiles for  
614 228 metabolite ions that exhibited higher abundance in the inoculated samples versus sterile controls  
615 (abundance>200%,  $p<0.05$ ). Cell colour represents the mean enrichment value from three independent  
616 experiments, measured via untargeted LC-MS exometabolomics. Rows were clustered via Pearson  
617 correlation. The numbered panel to the right of the heatmap shows eight clusters of metabolite ions, the  
618 grey triangle indicates where the dendrogram was cut to split these clusters. (E) Box plot of metabolite  
619 ion enrichment for cluster 2, which were primarily enriched only by strain Cpu. (F) Pie chart showing  
620 the chemical category of the candidate metabolite IDs for this cluster. Candidate IDs were generated by  
621 searching the m/z value of the depleted MS-feature against the Metlin database, and then the Classyfire  
622 database was used to categorise the chemical class of the top hit.

623

624 ***Figure 2: Metabolic niche profiling of the SynCom and constituent strains using phenotype***  
625 ***microarray.***



626 (A) Heat map of substrate utilisation on 29 carbon sources by the SynCom strains measured using  
627 BIOLOG EcoPlates. Cell colour represents mean A590 value of three independent replicates. (B) Box  
628 plots of substrate utilisation for three selected chemical categories.

629

630 ***Figure 3: Metabolic analysis of C6 ‘drop-out’ communities via phenotype microarray.***

631 (A) Heat map of substrate utilisation for the C6 communities where one strain was removed, as well as  
632 the intact C7 SynCom, measured using BIOLOG EcoPlate. Cell colour represents mean value of three  
633 independent replicates. (B) PCA of metabolic phenotypes for the C6 communities and the C7. (C)  
634 Scatter plot comparing the compositional dissimilarity of C6 communities versus C7 on maize roots  
635 previously measured in Niu et al (2017, PNAS 114:E2450) versus the metabolic dissimilarity of  
636 phenotype microarray profiles versus C7 measured in this study (Fig 3B). Error bars represent SD.

637

638 ***Figure 4: Growth assays and cross-feeding phenotypes of SynCom strains on minimal media.***

639 (A) Heat map of growth phenotypes for the individual SynCom strains cultivated on minimal media  
640 using nine sole carbon sources. Colour intensity corresponds to mean growth performance, measured  
641 via area under the curve in three independent experiments (B) Growth curves of all seven strains  
642 cultivated on minimal medium with alanine as sole carbon source. Data points represent the mean value  
643 of three independent replicates, grey shadings represent SD. (C) Heat map of cross-feeding phenotypes  
644 for the seven SynCom strains grown on culture supernatants harvested from either Ecl, Hfr and Ppu  
645 strains, following their pre-cultivation on either glucose, malate or alanine as sole carbon source. Colour  
646 intensity corresponds to mean growth performance, measured via area under the curve in four  
647 independent experiments. (D) Growth curves of the Opi strain cultivated on either a ‘fresh’ minimal  
648 medium with alanine as the sole carbon source, or on culture supernatants harvested from either Ecl,  
649 Hfr and Ppu, following their pre-cultivation on minimal medium with alanine as the sole carbon source.  
650 Data points represent the mean value of four independent replicates, grey shadings represent SD.

651

652 ***Figure 5: B-vitamin responses of the SynCom strains.***

653 (A) Bar chart showing the growth performance of each strain either with or without B-vitamin mixture.  
654 Statistical significance of each strain's vitamin response was determined using Student's t-test. Error  
655 bars represent SD, n=4. (B) Growth curves of strains Opi and Ecl either with or without B-vitamin  
656 mixture. Data points represent the mean value of four replicates, grey shadings represent SD.

657

658 ***Figure 6: Pinpointing B-vitamins required for growth of strain Opi.***

659 (A) Bar chart showing the effect of adding single B-vitamins on Opi growth performance. Groups  
660 annotated with the same letter are not significantly different using Tukey's HSD test ( $\alpha=0.95$ ). Error  
661 bars represent SD, n=4. (B) Bar chart showing the how Opi's growth performance is affected by V7  
662 mixes, where on single B-vitamin was removed from the eight-vitamin mixture. Groups annotated with  
663 the same letter are not significantly different using Tukey's HSD test ( $\alpha=0.95$ ). Error bars represent SD,  
664 n=4. (C) Growth curves of Opi strain cultivated either with no B-vitamins, with a full mixture of eight  
665 B-vitamins, or with a V2 addition of Thiamine and Biotin. Data points represent mean value of four  
666 replicates, grey shadings represent SD.

667

668 **Supplementary Figure Legends**

669 ***Supplementary Figure S1: Depletion of primary metabolites from maize root extract by the SynCom***  
670 ***and constituent strains.***

671 (A) Heat map of primary metabolites depletion by the SynCom strains measured via GC-MS  
672 exometabolomics of SynCom strains cultivated on maize root extract. Cell colour represents mean  
673 metabolite depletion value of three independent replicates. (B) Box plots of metabolite depletion for  
674 three categories of primary metabolites.

675

676 ***Supplementary Figure S2: Overview of metabolic profiles for the SynCom and constituent strains***  
677 ***measured via three methodologies.***

678 (A) Bar charts showing number of metabolite ions depleted by strains measured using LC-MS  
679 exometabolomics (metabolite ion abundance<50%, p-value<0.05), the number primary metabolites  
680 depleted by strains measured via GC-MS exometabolomics (metabolite abundance<50%, p-

681 value<0.05), and the number of substrates utilised for growth by phenotype microarray measured via  
682 BIOLOG EcoPlate (A595>0.1, p-value<0.05). Bars are divided into common and unique metabolic  
683 characteristics. For the individual strains, this involved comparing that strain's metabolic profile versus  
684 the six other individual strains (but not the C7), whereas for the C7, this involved comparing the C7  
685 profile versus the seven individual strains. (B) PCAs of metabolic phenotypes measured via LC-MS  
686 exometabolomics (untargeted), GC-MS exometabolomics (targeted) and phenotype microarray  
687 (BIOLOG EcoPlate). (C) Bar chart of Euclidean distance between each individual strain versus the C7  
688 SynCom for the PCAs in panel B. Here, smaller Euclidean distances indicate closer similarity between  
689 the metabolic profile of that individual strain versus the C7.

690

691 ***Supplementary Figure S3: Pinpointing B-vitamins required for growth of strain Cpu.***

692 (A) Bar chart showing the effect of adding single B-vitamins on Cpu growth performance. Groups  
693 annotated with the same letter are not significantly different using Tukey's HSD test ( $\alpha=0.95$ ). Error  
694 bars represent SD, n=4. (B) Bar chart showing the how Cpu growth performance is affected by V7  
695 mixes, created by removing single B-vitamins from the eight-vitamin mixture. Groups annotated with  
696 the same letter are not significantly different using Tukey's HSD test ( $\alpha=0.95$ ). Error bars represent SD,  
697 n=4.

698

699 ***Supplementary Figure S4: Concordance between computational prediction of vitamin auxotrophy***  
700 ***versus experimental measurement of vitamin dependency for SynCom strains.***

701 (A) Table showing computational prediction of biosynthetic pathway completeness for eight B-vitamins  
702 in the seven strains. Table represents percentage of enzymatic steps in each vitamin biosynthetic  
703 pathway that are annotated as present in that strain's genome, using IMG pipelines. Biosynthetic  
704 pathway enzymes follow Rodionov et al (2019, Front. Microbiol., 10:1316) (B) Table showing  
705 experimental B-vitamin dependency measured for the seven SynCom strains. Phenotypes of prototrophy  
706 and auxotrophy are inferred from the experimental data reported in Fig 5, Fig 6, and Fig S3. Strains Sma  
707 and Cin were not considered for this analysis, because they did not exhibit growth on any of the minimal  
708 media used in this study. Furthermore, cobalamine (B12) was also not considered for this analysis,

709 because experimental data indicate that none of these strains receive a growth benefit from exogenous  
710 B12, while computational analyses indicate that all strains' genomes encode B12-independent enzymes  
711 for methionine synthesis and nucleotide metabolism, which together suggests that B12 is not an obligate  
712 nutrient for these strains. (C) Table showing concordance between computational predictions of vitamin  
713 auxotrophy versus experimental measurements of vitamin dependency. Entries were generated by  
714 integrating the predictions in panel A versus the experimental measurements in panel B (not considering  
715 strains Sma and Cin, or vitamin cobalamine). (D) Bar chart summarising the accuracy of computational  
716 predictions of vitamin auxotrophy for SynCom strains. Chart was generated by plotting the contents of  
717 panel C for the 35 considered entries (ie: seven vitamins in five strains).

718

### 719 **Supplementary Tables**

720 **Table S1:** Abundance values and LC-MS information for 425 metabolite ions present in maize root  
721 extract and depleted by at least one bacterial inoculum in LC-MS exometabolomic experiments.

722

723 **Table S2:** Abundance values and LC-MS information for 228 metabolite ions enriched into the  
724 extracellular medium by at least one bacterial inoculum in LC-MS exometabolomic experiments.

725

726 **Table S3:** Abundance values for 25 primary metabolites present in maize root extract and depleted by  
727 bacterial inocula in GC-MS exometabolomic experiments.

728

729 **Table S4:** Substrate utilisation measurements for 29 carbon sources present on BIOLOG Ecoplate  
730 phenotype microarrays.

731

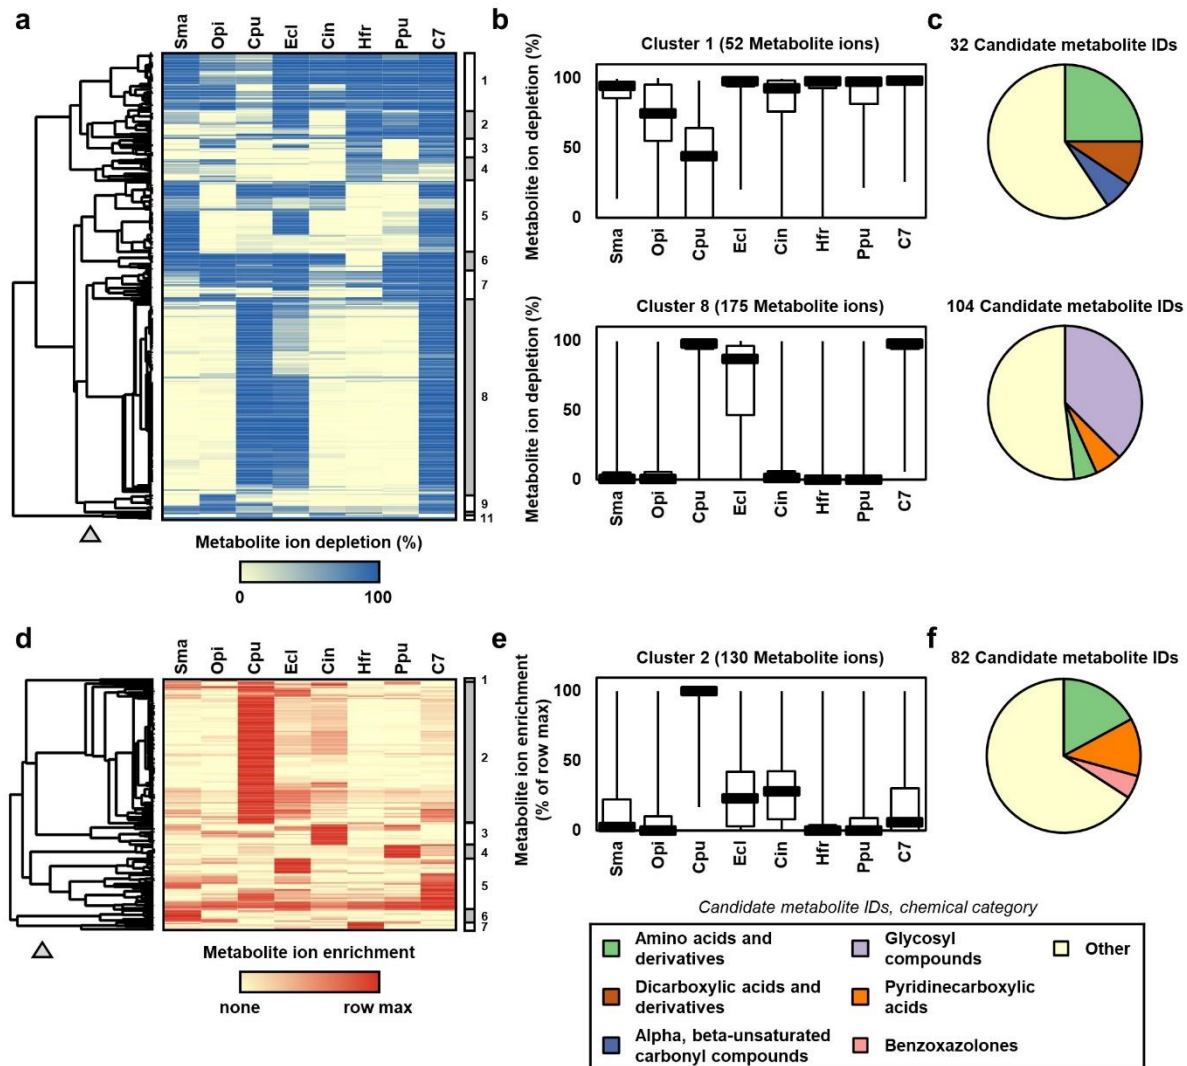

**Figure 1: Metabolic footprints of the SynCom and constituent strains on maize root extract.**

(A) Heat map showing metabolite depletion profiles for 425 metabolite ions present in maize root extract, measured by LC-MS exometabolomics. Metabolite ions were included if they were depleted by at least one inoculum (LC-MS abundance < 50% compared to sterile control,  $p < 0.05$ ), cell colour represents the mean depletion value from three independent replicates. Rows were clustered via Pearson correlation. The numbered panel to the right of the heatmap shows 11 clusters of metabolite ions, the grey triangle indicates where the dendrogram was cut to split these clusters. (B) Box plots of metabolite ion depletion for two metabolite ion clusters in panel A. Cluster 1 contains metabolite ions generally depleted by all seven strains and the C7, whereas cluster 8 contains metabolite ions that were primarily depleted only by strains Cpu, Ecl and the C7. (C) Pie charts showing the chemical category of the candidate metabolite IDs for these two clusters. Candidate IDs were generated by searching the m/z value of the depleted metabolite ion against the Metlin database, and then the Classyfire database was used to categorise the chemical class of the top hit. (D) Heat map of metabolite enrichment profiles for 228 metabolite ions that exhibited higher abundance in the inoculated samples versus sterile controls (abundance > 200%,  $p < 0.05$ ). Cell colour represents the mean enrichment value from three independent experiments, measured via untargeted LC-MS exometabolomics. Rows were clustered via Pearson correlation. The numbered panel to the right of the heatmap shows eight clusters of metabolite ions, the grey triangle indicates where the dendrogram was cut to split these clusters. (E) Box plot of metabolite ion enrichment for cluster 2, which were primarily enriched only by strain Cpu. (F) Pie chart showing the chemical category of the candidate metabolite IDs for this cluster. Candidate IDs were generated by searching the m/z value of the depleted MS-feature against the Metlin database, and then the Classyfire database was used to categorise the chemical class of the top hit.

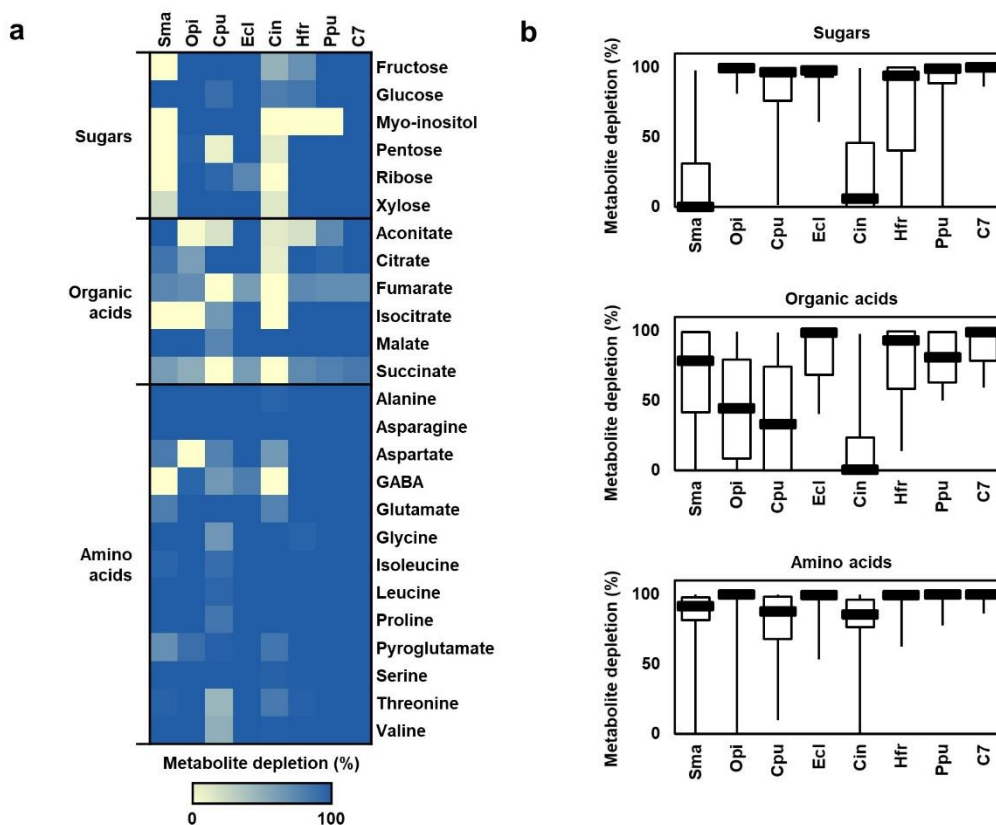

**Supplementary Figure S1: Depletion of primary metabolites from maize root extract by the SynCom and constituent strains.**

(A) Heat map of primary metabolites depletion by the SynCom strains measured via GC-MS exometabolomics of SynCom strains cultivated on maize root extract. Cell colour represents mean metabolite depletion value of three independent replicates. (B) Box plots of metabolite depletion for three categories of primary metabolites.

733  
734  
735

736

737

738

739

740

741

742

743

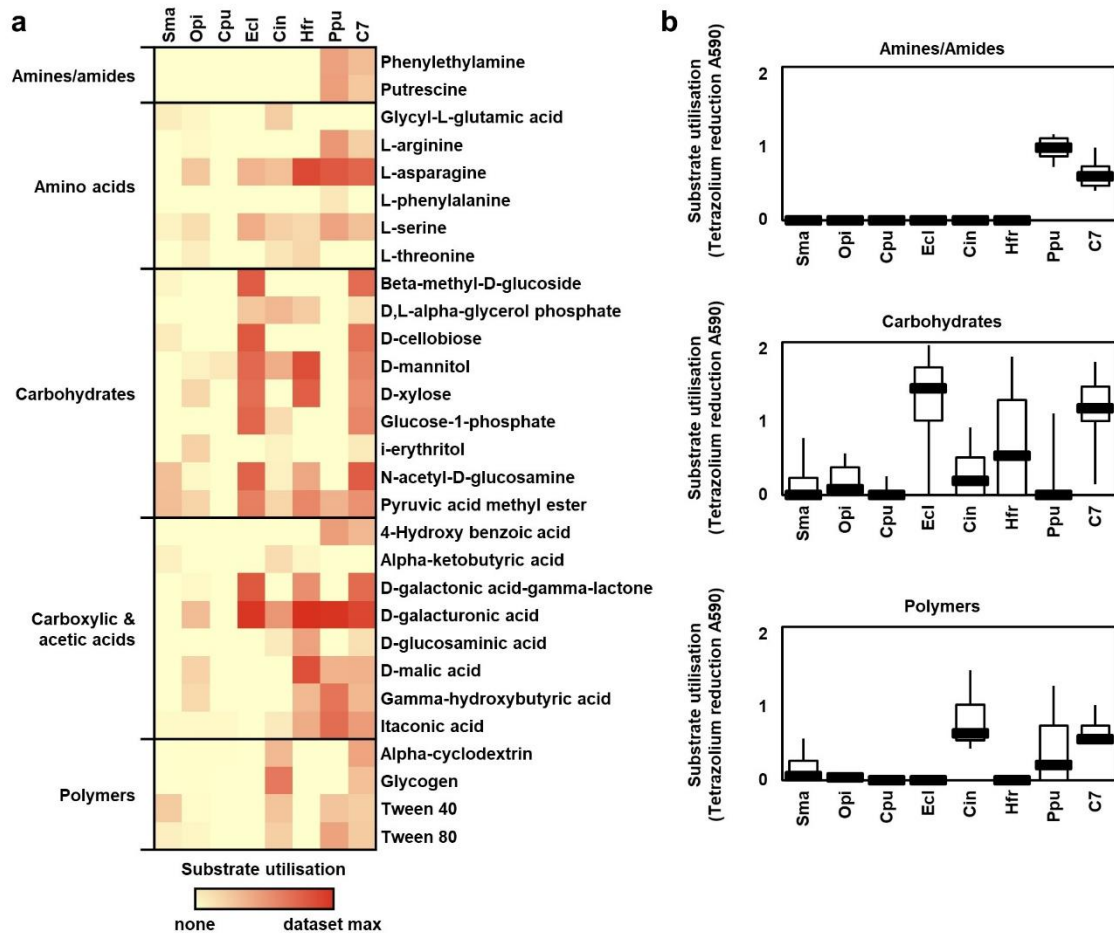

744

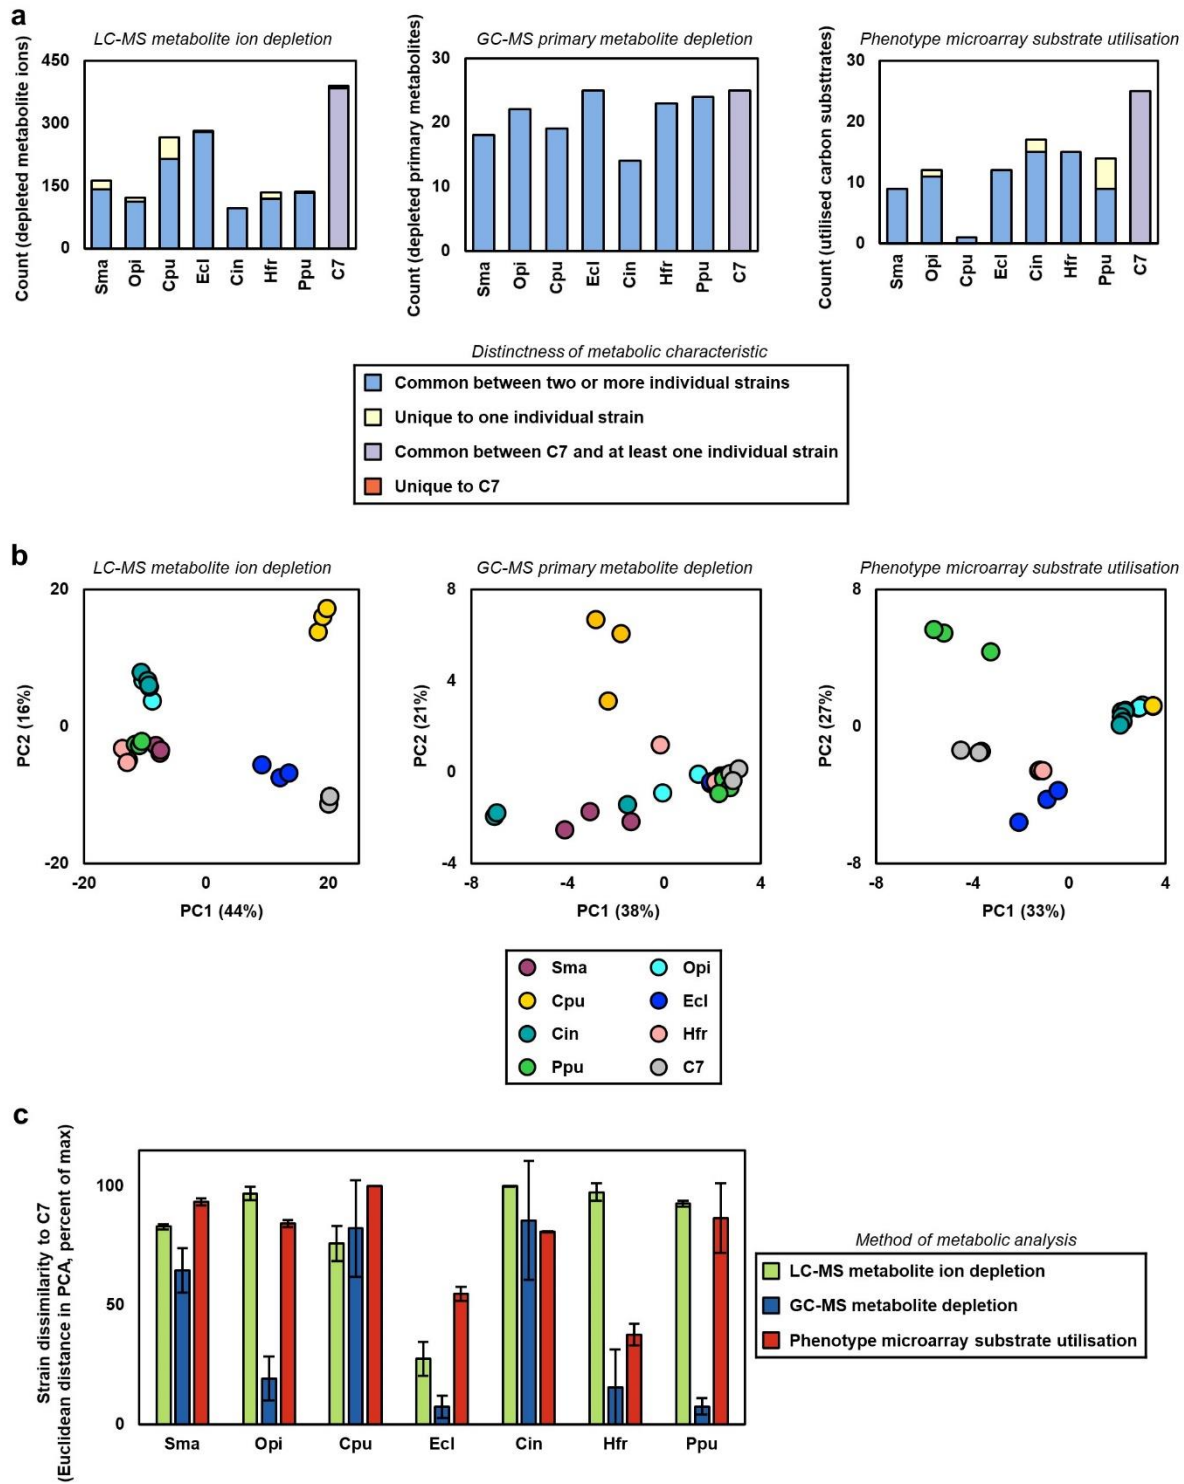

**Supplementary Figure 2: Overview of metabolic profiles for the SynCom and constituent strains measured via three methodologies.**

(A) Bar charts showing number of metabolite ions depleted by strains measured using LC-MS exometabolomics (metabolite ion abundance <50%, p-value<0.05), the number primary metabolites depleted by strains measured via GC-MS exometabolomics (metabolite abundance<50%, p-value<0.05), and the number of substrates utilised for growth by phenotype microarray measured via BIOLOG EcoPlate (A595>0.1, p-value<0.05). Bars are divided into common and unique metabolic characteristics. For the individual strains, this involved comparing that strain's metabolic profile versus the six other individual strains (but not the C7), whereas for the C7, this involved comparing the C7 profile versus the seven individual strains. (B) PCAs of metabolic phenotypes measured via LC-MS exometabolomics (untargeted), GC-MS exometabolomics (targeted) and phenotype microarray (BIOLOG EcoPlate). (C) Bar chart of Euclidean distance between each individual strain versus the C7 SynCom for the PCAs in panel B. Here, smaller Euclidean distances indicate closer similarity between the metabolic profile of that individual strain versus the C7.

745  
746  
747



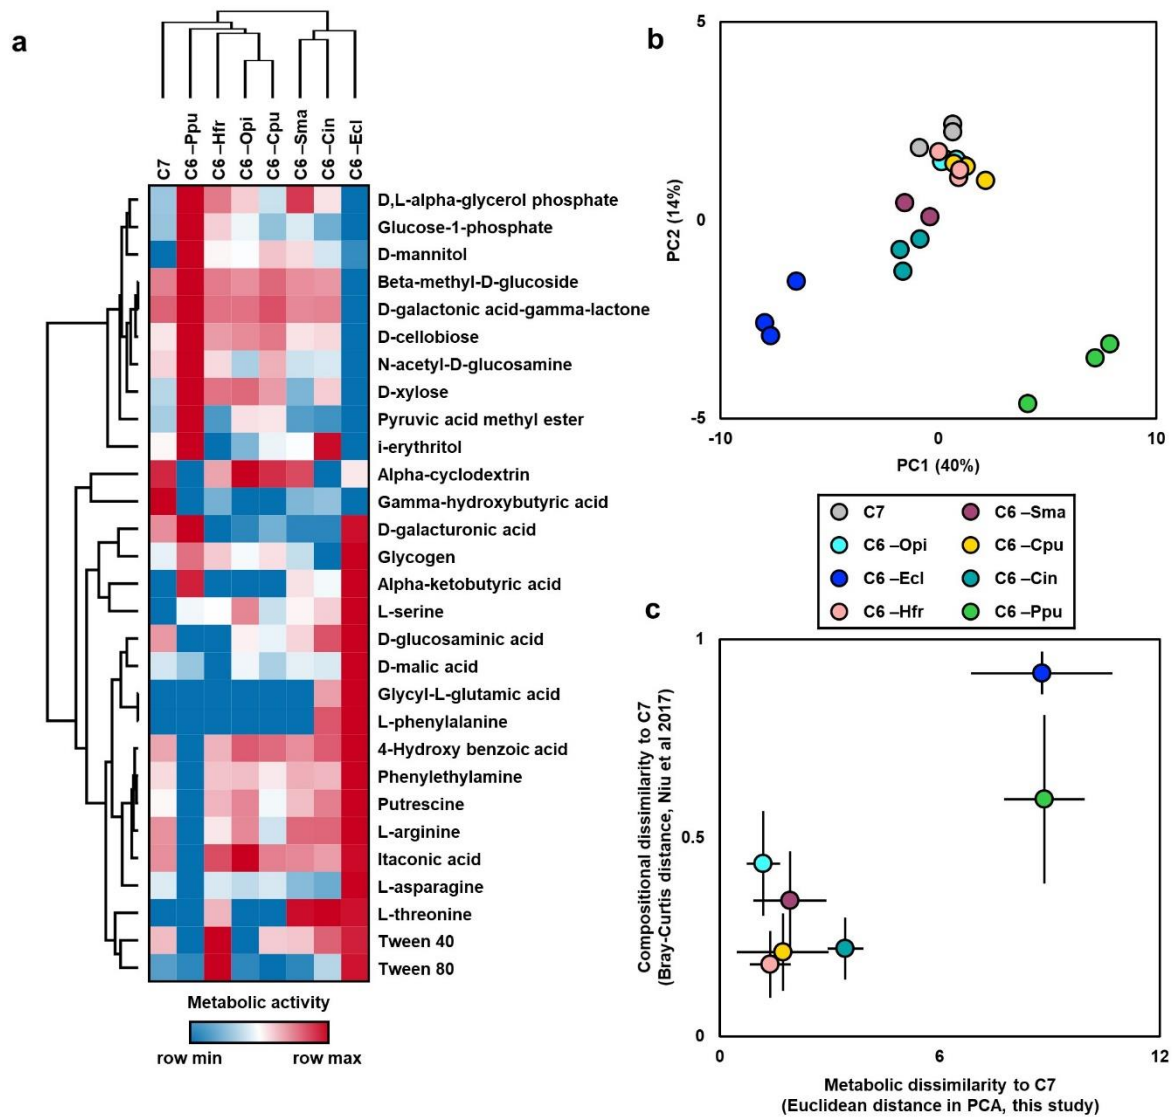

**Figure 3: Metabolic analysis of C6 'drop-out' communities via phenotype microarray.**

(A) Heat map of substrate utilisation for the C6 communities where one strain was removed, as well as the intact C7 SynCom, measured using BIOLOG EcoPlate. Cell colour represents mean value of three independent replicates. (B) PCA of metabolic phenotypes for the C6 communities and the C7. (C) Scatter plot comparing the compositional dissimilarity of C6 communities versus C7 on maize roots previously measured in Niu et al (2017, PNAS 114:E2450) versus the metabolic dissimilarity of phenotype microarray profiles versus C7 measured in this study (Fig 3B).

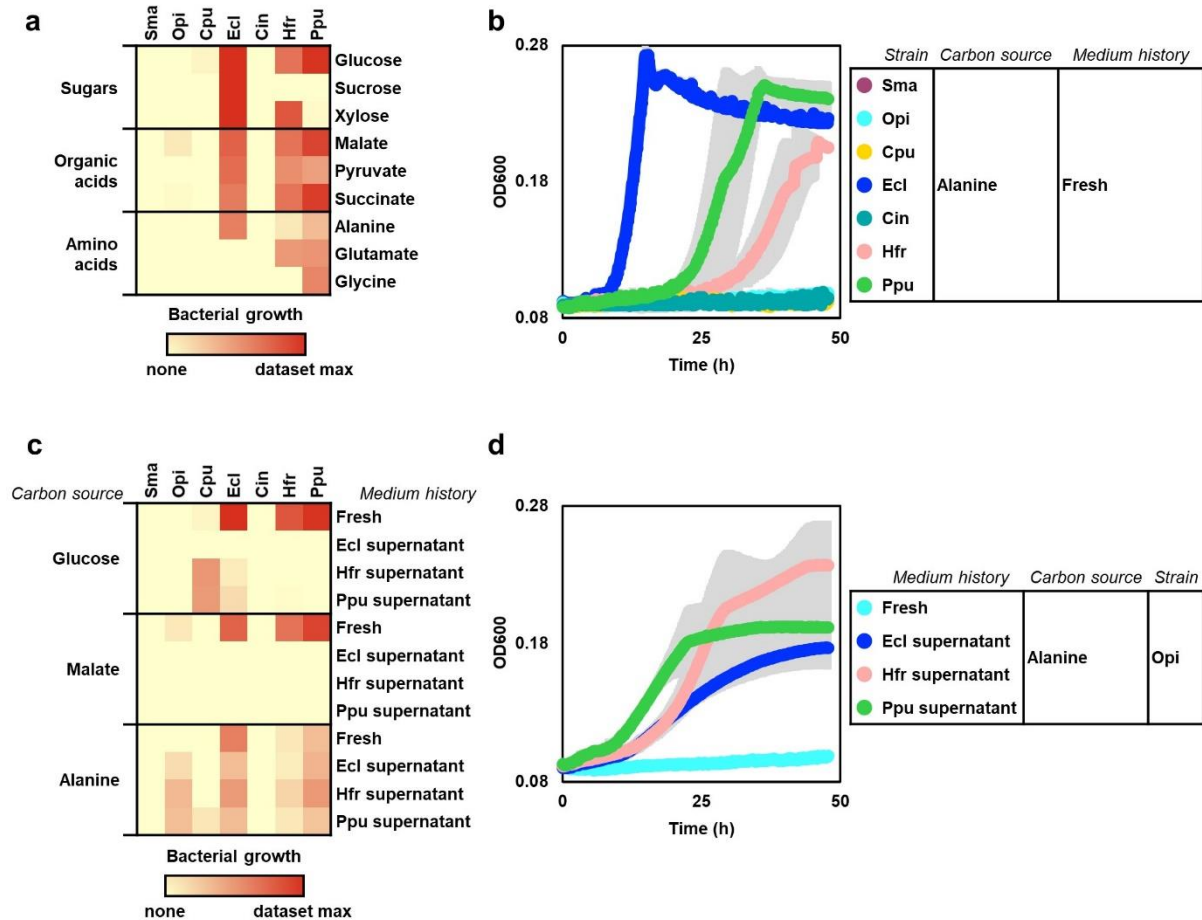

**Figure 4: Growth assays and cross-feeding phenotypes of SynCom strains on minimal media.**

(A) Heat map of growth phenotypes for the individual SynCom strains cultivated on minimal media using nine sole carbon sources. Colour intensity corresponds to mean growth performance, measured via area under the curve in three independent experiments (B) Growth curves of all seven strains cultivated on minimal medium with alanine as sole carbon source. Data points represent the mean value of three independent replicates, grey shadings represent SD. (C) Heat map of cross-feeding phenotypes for the seven SynCom strains grown on culture supernatants harvested from either Ecl, Hfr and Ppu strains, following their pre-cultivation on either glucose, malate or alanine as sole carbon source. Colour intensity corresponds to mean growth performance, measured via area under the curve in four independent experiments. (D) Growth curves of the Opi strain cultivated on either a 'fresh' minimal medium with alanine as the sole carbon source, or on culture supernatants harvested from either Ecl, Hfr and Ppu, following their pre-cultivation on minimal medium with alanine as the sole carbon source. Data points represent the mean value of four independent replicates, grey shadings represent SD.

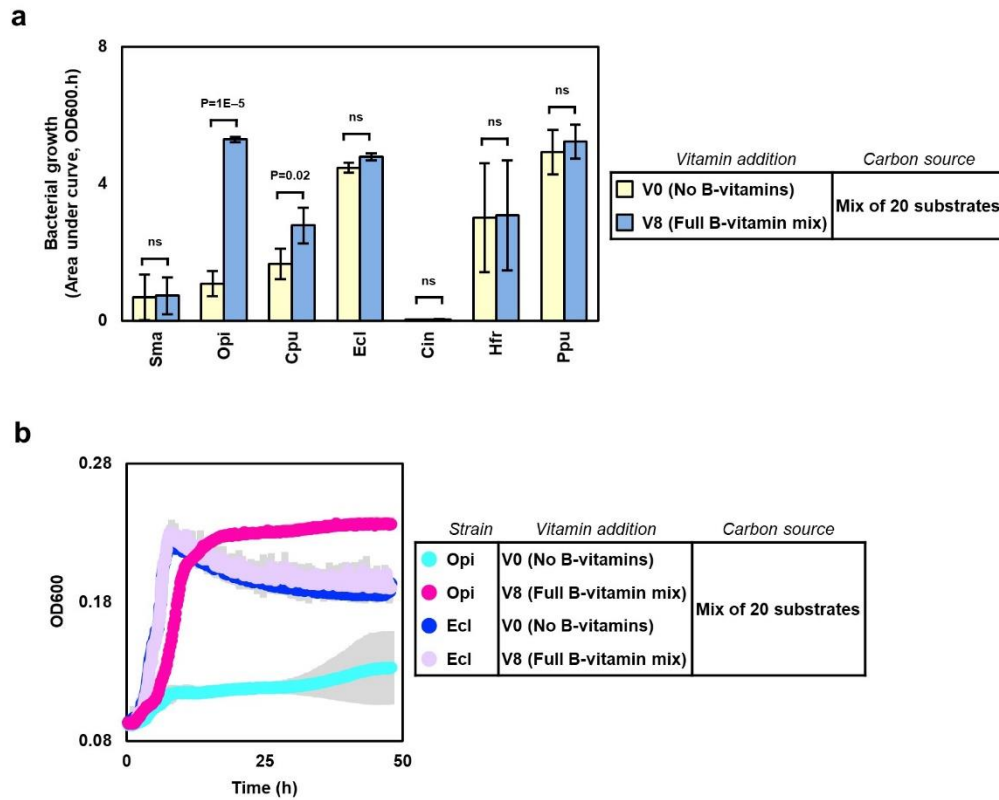

**Figure 5: B-vitamin responses of the SynCom strains.**

(A) Bar chart showing the growth performance of each strain either with or without B-vitamin mixture. Statistical significance of each strain's vitamin response was determined using Student's t-test. Error bars represent SD, n=4. (B) Growth curves of strains Opi and Ecl either with or without B-vitamin mixture. Data points represent the mean value of four replicates, grey shadings represent SD.

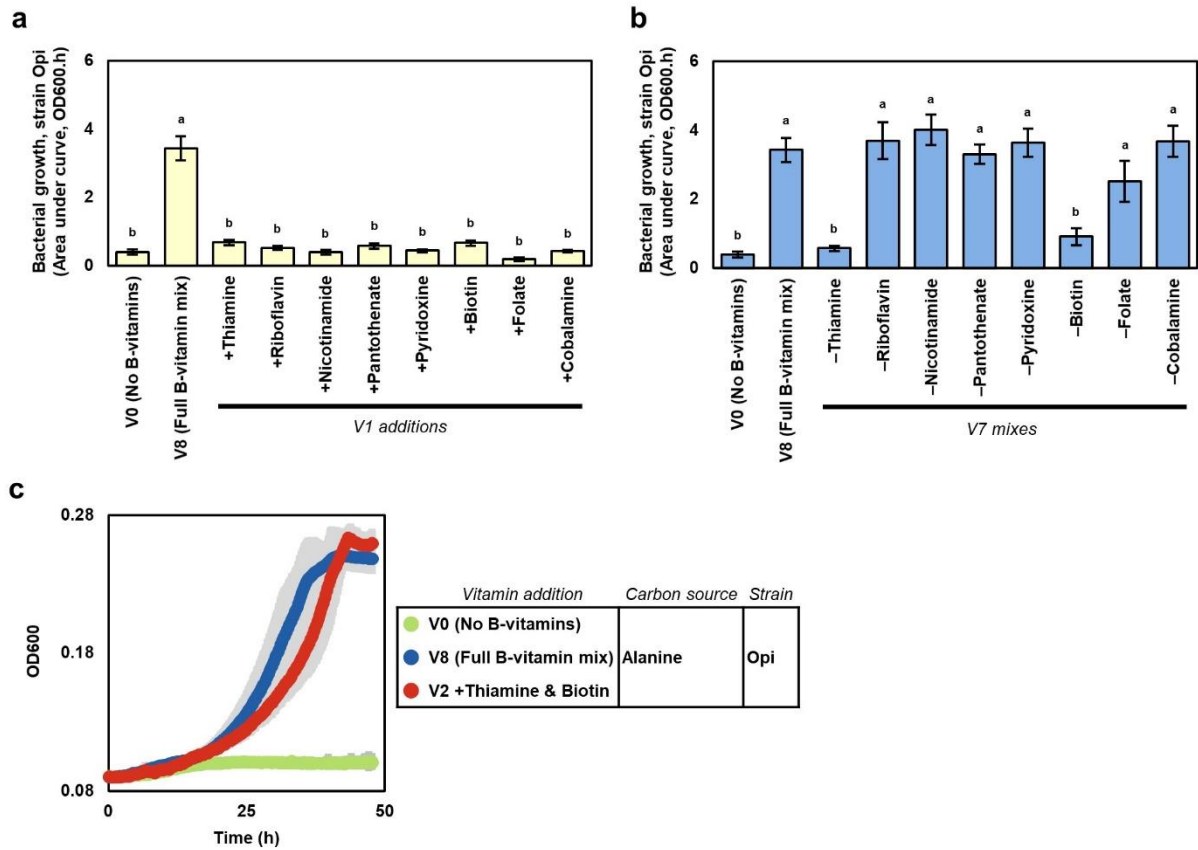

**Figure 6: Pinpointing B-vitamins required for growth of strain Opi.**

(A) Bar chart showing the effect of adding single B-vitamins on Opi growth performance. Groups annotated with the same letter are not significantly different using Tukey's HSD test ( $\alpha=0.95$ ). Error bars represent SD,  $n=4$ . (B) Bar chart showing the how Opi's growth performance is affected by V7 mixes, created by removing single B-vitamins from the eight-vitamin mixture. Groups annotated with the same letter are not significantly different using Tukey's HSD test ( $\alpha=0.95$ ). Error bars represent SD,  $n=4$ . (C) Growth curves of Opi strain cultivated either with no B-vitamins, with a full mixture of eight B-vitamins, or with a V2 addition of Thiamine and Biotin. Data points represent mean value of four replicates, grey shadings represent SD.

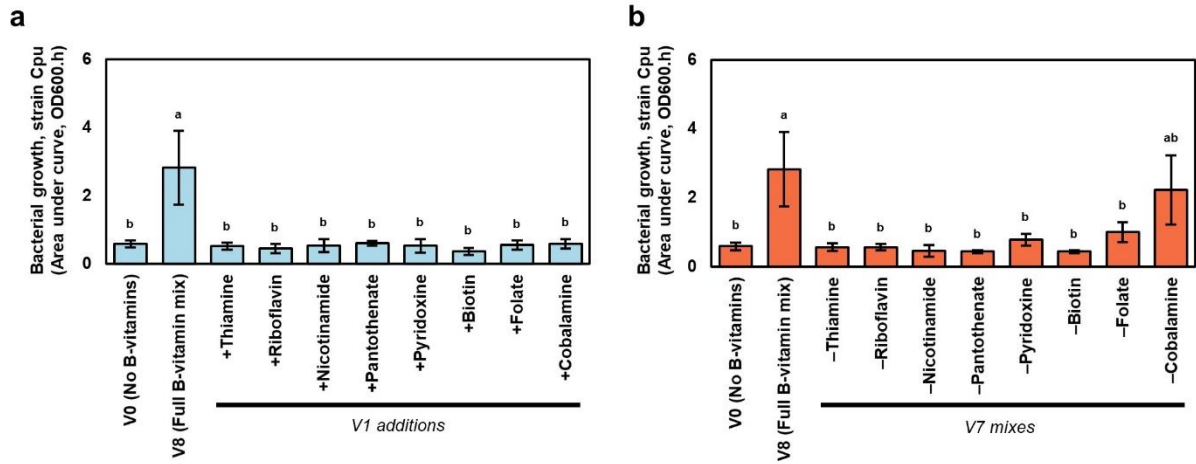

**Supplementary Figure S3: Pinpointing B-vitamins required for growth of strain Cpu.**

(A) Bar chart showing the effect of adding single B-vitamins on Cpu growth performance. Groups annotated with the same letter are not significantly different using Tukey's HSD test ( $\alpha=0.95$ ). Error bars represent SD,  $n=4$ . (B) Bar chart showing how Cpu growth performance is affected by V7 mixes, created by removing single B-vitamins from the eight-vitamin mixture. Groups annotated with the same letter are not significantly different using Tukey's HSD test ( $\alpha=0.95$ ). Error bars represent SD,  $n=4$ .

752

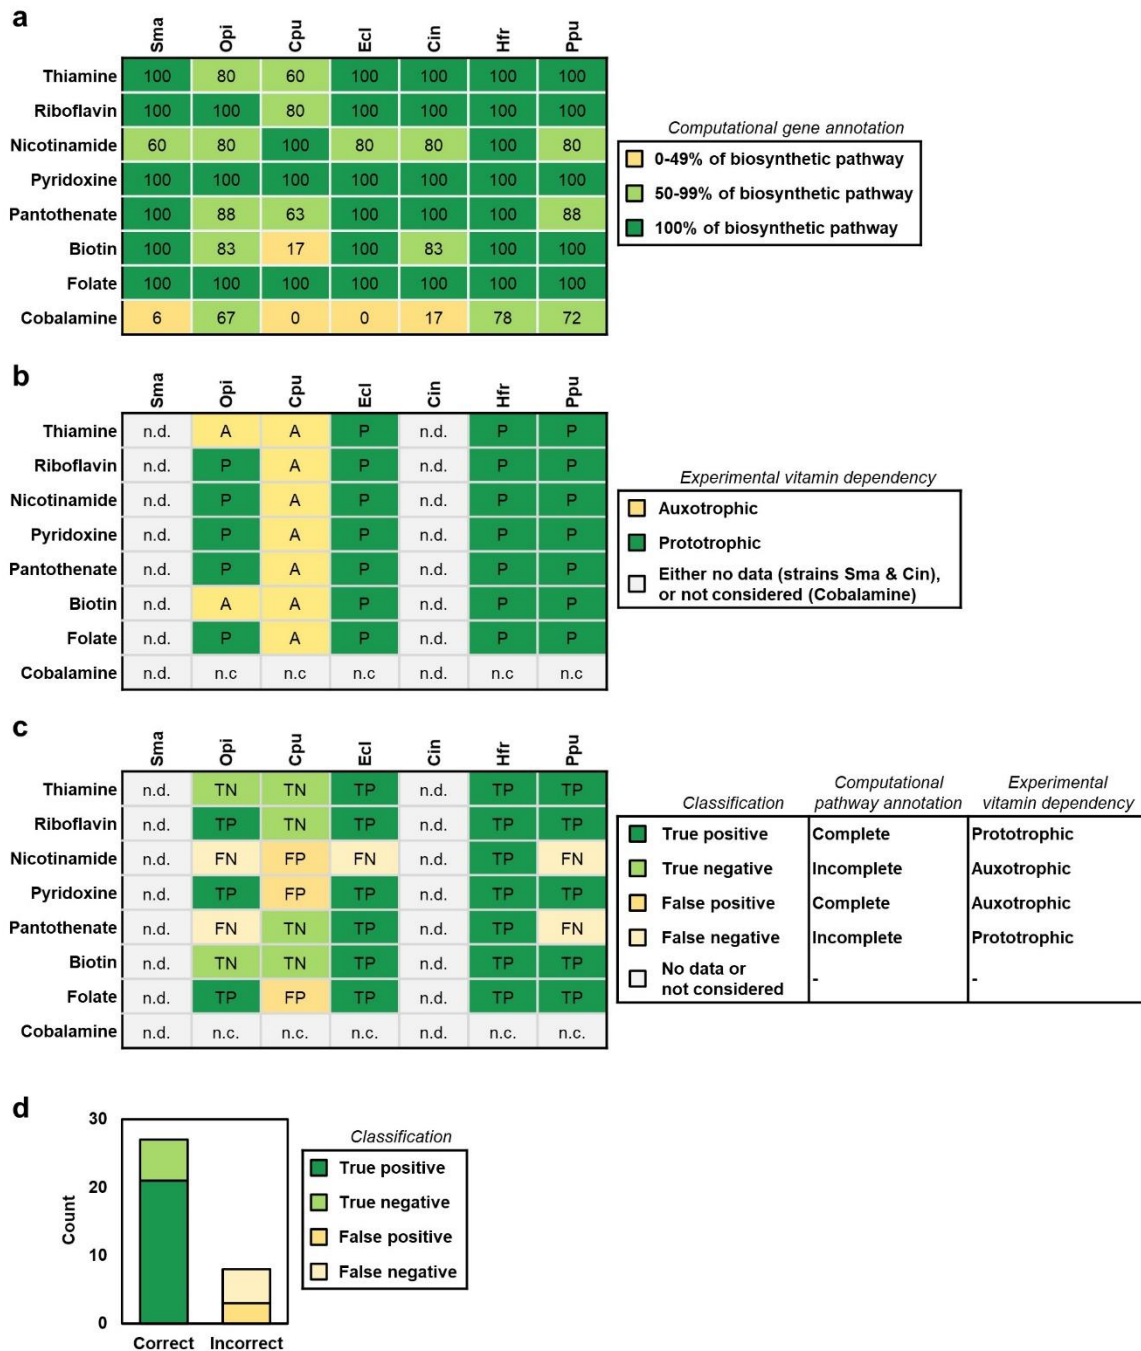

**Supplementary Figure S4: Concordance between computational prediction of vitamin auxotrophy versus experimental measurement of vitamin dependency for SynCom strains.**

(A) Table showing computational prediction of biosynthetic pathway completeness for eight B-vitamins in the seven strains. Table represents percentage of enzymatic steps in each vitamin biosynthetic pathway that are annotated as present in that strain's genome, using IMG pipelines. Biosynthetic pathway enzymes follow Rodionov et al (2019, Front. Microbiol., 10:1316) (B) Table showing experimental B-vitamin dependency measured for the seven SynCom strains. Phenotypes of prototrophy and auxotrophy are inferred from the experimental data reported in Fig 5, Fig 6, and Fig S3. Strains Sma and Cin were not considered for this analysis, because they did not exhibit growth on any of the minimal media used in this study. Furthermore, cobalamin (B12) was also not considered for this analysis, because experimental data indicate that none of these strains receive a growth benefit from exogenous B12, while computational analyses indicate that all strains' genomes encode B12-independent enzymes for methionine synthesis and nucleotide metabolism, which together suggests that B12 is not an obligate nutrient for these strains. (C) Table showing concordance between computational predictions of vitamin auxotrophy versus experimental measurements of vitamin dependency. Entries were generated by integrating the predictions in panel A versus the experimental measurements in panel B (not considering strains Sma and Cin, or vitamin cobalamin). (D) Bar chart summarising the accuracy of computational predictions of vitamin auxotrophy for SynCom strains. Chart was generated by plotting the contents of panel C for the 35 considered entries (ie: seven vitamins in five strains).
